# Supplementary material for: Chemotherapy-induced infiltration of neutrophils promotes pancreatic cancer metastasis via Gas6/AXL signalling axis
Source: Gut. 2022 Jan 12;71(11):2284–99. doi: 10.1136/gutjnl-2021-325272 (PMC9554050; doi:10.1136/gutjnl-2021-325272)
Supplement: Supplementary data [file gutjnl-2021-325272supp002.xlsx]

## Sheet: GenesUP CTX neutrophils
Top upregulated genes expressed by metastasis infiltrating neutrophils in response to gemcitabine and associated with GO extracellular region or cell surface
Name	Gene name
angiogenin	Ang
polymeric immunoglobulin receptor	Pigr
tubby-like protein 3	Tulp3
fibronectin 1	Fn1
plasminogen activator, tissue type	Plat
bone morphogenetic protein 2	Bmp2
growth arrest specific 6	Gas6
interleukin 10	Il10
angiotensin I Converting Enzyme	Ace
von willebrand factor	Vwf
proteinase 3	Prtn3
wnt family member 2	Wnt2
extracellular matrix protein 1	Ecm1
elastin microfibril interfacer 1	Emilin1
milk fat globule EGF and factor V/VIII domain containing	Mfge8
apolipoprotein A1	Apoa1
clusterin	Clu
C-X-C motif chemokine ligand 3	Cxcl3
interleukin 6	Il6
protein disulfide-isomerase A3	Pdia3
