# Supplementary material for: Chemotherapy-induced infiltration of neutrophils promotes pancreatic cancer metastasis via Gas6/AXL signalling axis
Source: Gut. 2022 Jan 12;71(11):2284–99. doi: 10.1136/gutjnl-2021-325272 (PMC9554050; doi:10.1136/gutjnl-2021-325272)
Supplement: Supplementary data [file gutjnl-2021-325272supp003.xlsx]

## Sheet: Gene list_GO extracellular
List of differentially expressed genes by metastasis infiltrating neutrophils in response to gemcitabine treatment and associated with GO "extracellular region" and/or "cell surface"
		CTX/CTR
Gene	GO_cell_surface_extracellular_region	log2_ratio_fpm
Ang	extracellular region	7.90244
Pigr	extracellular region	7.11076
Tulp3	extracellular region	5.09858
Fn1	extracellular region	3.34205
Plat	cell surface; extracellular region	3.19015
Bmp2	cell surface; extracellular region	2.8749
Gas6	extracellular region	2.84907
Il10	extracellular region	2.81758
Ace	extracellular region	2.41129
Vwf	extracellular region	2.35391
Prtn3	extracellular region	2.22805
Wnt2	extracellular region	1.95503
Ecm1	extracellular region	1.89244
Emilin1	extracellular region	1.70302
Mfge8	extracellular region	1.68971
Apoa1	cell surface; extracellular region	1.62375
Clu	cell surface; extracellular region	1.42036
Cxcl3	extracellular region	1.23541
Il6	extracellular region	1.05628
Pdia3	cell surface; extracellular region	1.04094
Vegfa	cell surface; extracellular region	0.942922
Fcnb	extracellular region	0.860087
Thbs1	cell surface; extracellular region	0.823457
Bag6	extracellular region	0.720994
Hsp90ab1	cell surface; extracellular region	0.677558
Nmb	extracellular region	0.676519
Lif	extracellular region	0.614786
Prok2	extracellular region	0.593217
Lgals3	cell surface; extracellular region	0.591751
Crlf2	extracellular region	0.503039
Manf	extracellular region	0.491816
Ccl6	extracellular region	0.487233
Efna1	extracellular region	0.482857
Tnfsf14	extracellular region	0.470559
Apoc3	extracellular region	0.433322
Il27	extracellular region	0.41711
Gpi1	extracellular region	0.404928
Timp2	cell surface; extracellular region	0.402634
Pglyrp1	extracellular region	0.385356
Il16	extracellular region	0.37557
Psap	extracellular region	0.365857
Gnas	extracellular region	0.342198
Hmgb2	extracellular region	0.321333
Pycard	extracellular region	0.285124
Erap1	extracellular region	0.283534
Il23a	extracellular region	0.249297
Ly96	extracellular region	0.229375
Dpp4	cell surface; extracellular region	0.219183
Inhba	extracellular region	0.18689
Cxadr	extracellular region	0.186223
Retnlg	extracellular region	0.182715
Tgfbi	extracellular region	0.17097
Grn	extracellular region	0.16597
Nampt	extracellular region	0.16186
Fgb	cell surface; extracellular region	0.161287
Copa	extracellular region	0.160558
Osm	extracellular region	0.159162
Trf	cell surface; extracellular region	0.158975
S100a9	extracellular region	0.153005
Il15	cell surface; extracellular region	0.145338
Lbp	cell surface; extracellular region	0.126542
Tnfsf13b	extracellular region	0.112558
Ttr	extracellular region	0.109729
Igf1	extracellular region	0.106508
Il1b	extracellular region	0.104947
Aimp1	cell surface; extracellular region	0.0963269
Retn	extracellular region	0.0903306
Ccl7	extracellular region	0.0844746
Saa3	extracellular region	0.0837461
Kdr	cell surface; extracellular region	0.0393157
Fgg	cell surface; extracellular region	0.0387842
Csf3	extracellular region	0.0324837
Plaur	cell surface; extracellular region	0.00430994
Hmgb1	extracellular region	-0.00352246
Il12a	cell surface; extracellular region	-0.0226147
Il1rn	extracellular region	-0.0246392
Isg15	extracellular region	-0.0373472
Cxcl2	extracellular region	-0.0414915
Fcna	extracellular region	-0.0515991
Cklf	extracellular region	-0.0574434
Il18	extracellular region	-0.0576243
Il1rap	extracellular region	-0.0649958
S100a8	extracellular region	-0.0700595
Spp1	extracellular region	-0.0847482
Cd9	cell surface; extracellular region	-0.100051
Egfl7	cell surface; extracellular region	-0.109966
Hbegf	cell surface; extracellular region	-0.149873
Ccl4	extracellular region	-0.153436
Gla	extracellular region	-0.158185
Ppia	extracellular region	-0.167227
Il6ra	cell surface; extracellular region	-0.179666
Apoa2	extracellular region	-0.183578
Adam17	cell surface; extracellular region	-0.192285
Lgals9	extracellular region	-0.199738
C3	cell surface; extracellular region	-0.209947
Cxcl10	extracellular region	-0.222798
Sdcbp	extracellular region	-0.223192
Il1a	cell surface; extracellular region	-0.230239
Ebi3	extracellular region	-0.255532
Cxcl9	extracellular region	-0.262107
Fgl2	extracellular region	-0.272512
Metrnl	extracellular region	-0.295737
Csf1	extracellular region	-0.310533
Flt3l	cell surface; extracellular region	-0.319354
Asah1	extracellular region	-0.330908
Mif	cell surface; extracellular region	-0.336103
Hilpda	cell surface; extracellular region	-0.342833
Ccl9	extracellular region	-0.390188
Ccl3	extracellular region	-0.416578
Cd2	cell surface; extracellular region	-0.417277
Cnpy4	extracellular region	-0.433977
Tnf	cell surface; extracellular region	-0.439449
Apoe	cell surface; extracellular region	-0.445474
Kng2	extracellular region	-0.451015
Pdcd6ip	extracellular region	-0.502314
Vtn	extracellular region	-0.528598
Ccl25	extracellular region	-0.54656
Cxcl1	extracellular region	-0.569652
Nucb2	extracellular region	-0.588001
S100a13	extracellular region	-0.58831
App	cell surface; extracellular region	-0.684607
Hamp	extracellular region	-0.685281
Edn1	extracellular region	-0.685721
Ccl2	extracellular region	-0.693821
Jam3	cell surface; extracellular region	-0.695289
Ccl24	extracellular region	-0.926799
Lifr	extracellular region	-0.937617
Lta	extracellular region	-0.978608
Ccl5	extracellular region	-1.26183
Kng1	extracellular region	-1.37929
Fga	cell surface; extracellular region	-1.57595
Dand5	extracellular region	-2.0803
Flrt1	extracellular region	-2.17638
Tgfbr3	cell surface; extracellular region	-2.40204
F2	extracellular region	-2.47776
Tnfsf10	extracellular region	-2.98718
Gal	extracellular region	-3.39877
Angpt2	extracellular region	-3.53395
Cdnf	extracellular region	-4.85874
Efemp1	extracellular region	-5.51198
Flrt2	extracellular region	-7.97882
