# Supplementary material for: Chemotherapy-induced infiltration of neutrophils promotes pancreatic cancer metastasis via Gas6/AXL signalling axis
Source: Gut. 2022 Jan 12;71(11):2284–99. doi: 10.1136/gutjnl-2021-325272 (PMC9554050; doi:10.1136/gutjnl-2021-325272)
Supplement: Supplementary data [file gutjnl-2021-325272supp004.xlsx]

## Sheet: Haematology PDAC patients
Haematology	Patient1			Patient2
	baseline	week1	week4	baseline	week1	week4
WBC	14	4.6	8.2	10.1	6.1	8.1
RBC	3.76	3.54	3.43	4.64	4.39	4.13
Haemoglobin	121	115	114	136	127	120
Haematocrit	0.363	0.345	0.324	0.406	0.389	0.369
MCV	96.6	97.4	94.4	87.4	88.6	89.3
Mean Corpuscular Haemoglobin	32.3	32.6	33.3	29.3	28.9	29.1
Plt Count	257	194	445	138	62	305
Neutrophils	12.1	2.6	5.4	8.9	4.1	6.9
Lymphocytes	1	1.5	1.7	0.6	0.7	0.7
Monocytes	0.8	0.3	0.9	0.5	0.2	0.4
Eosinophils	0	0	0.1	0	0	0
Basophils	0.1	0.2	0.2	0	0	0
